# Supplementary material for: PLEK: a tool for predicting long non-coding RNAs and messenger RNAs based on an improved k-mer scheme
Source: PubMed Central journal article supplement (PMC4177586; doi:10.1186/1471-2105-15-311), 2014-09-19
Supplement: 12859_2013_6586_MOESM1_ESM.pdf [file 12859_2013_6586_MOESM1_ESM.pdf]

## **Additional file 1 of PLEK**

### **Demonstration of indel sequencing error simulation**

We take a protein-coding transcript *NM\_001012425.1* from RefSeq for example. For convenience, we mark every homopolymer of longer than 3 bases as  $P_1, P_2, \dots$ , and so on (see **Box 1**). There are 18 homopolymers in total. We simulate 2 indels per 100 bases (indel error rate is 2%). For this transcript with a length of  $l=751$  bases, it will have  $n=l*p=751*2\%=15$  indels if the indel error rate is  $p=2\%$ . We first count the numbers of homopolymers of various lengths. The corresponding numbers of different homopolymers with lengths of  $l_1=6, l_2=5, l_3=4$  are  $m_1=2, m_2=2, m_3=14$ , respectively, where  $l_1 > l_2 > l_3$  (see **Table S1**). The likelihood of an indel increases with the length of the homopolymer. The indels start with the longest homopolymers with the length of  $l_1=6$ . In other words, initially, there are indels at  $P_2$  and  $P_{10}$  positions. Then, the homopolymers with the length of  $l_2=5$  are also inserted or deleted with identical bases (at  $P_7$  and  $P_{14}$  positions). Finally, 11 of 14 homopolymers of 4 bases are processed in the same way. For these homopolymers, we randomly insert or delete an identical base. If there are many homopolymers and few indels, the positions of indels will be evenly distributed in transcripts. See **Box 2**, insertions were marked as nucleotides with borders, and deletions with background shadow. The numbers in braces were the order in which we inserted or deleted identical bases.

## Box 1 Homopolymers of longer than 3 bases in NM\_001012425.1

Homopolymers of longer than 3 bases were marked as  $P_1, P_2, \dots$ , and so on. There are 18 homopolymers in total.

```
>gi|60218900|ref|NM_001012425.1| Homo sapiens chromosome 1 open reading frame 146 (C1orf146),
mRNA;
ACCCTGAGCGGTCTCTGAGGACCTGGTGAGCAGATTGTTGCACCATTAGAAGCTAGGT

TGATCCACAGACAGATGGCTGAAAGTGGAAAAGAAAAAATAAAATGGACAACCACCA
                                P1      P2      P3
TTATTATTAGCTCATCTCTTAAGAGTTATGAAGTTGCAACTGCCCTAGAAAATCGAAGCC
                                                P4
ACAAAGTTCGATATTCAGATTCAGTGGAAAATGGATCAATTATATTTTCTCTTTCTGGAG
                                P5                                P6
TTGCATTTTTATTAATGGATACTAAGGAATGTCTTCTGTCAACTGAAGAAATATTCTAG
                                P7
CCAAAATTGAGAAATTTATTAACATTCACCAAAATAGTTTTTTGGTTTTGTCTGCTGCC
                                P8                                P9      P10      P11
TCCATGGGCCTGAAGAATGGAAACTGATGTTTCAGGATTCAGCAGAGATTCCTGGGTTG

TAACTTACGAATACTTCCAGTACACAACACAGTAAATGCTATTAATCTTATGTGCACTAT

AGCAAAGACTACCTCCAAACCATACATAGATAGCATTGCTACAGAATGATAACAGCTA

AAGCTTACATCATTGAGCAAAGTCCTGTTTGGAAAACACTTCAGAAGATAAAACTGAA
                                P12                                P13
TAGTGATTCAGTTAACCCAAATTAGAGTACCAACTTAATGTTTTTCTCGAAGAATGTGA
                                                P14                                P15
AAATAATTAGACCTGTAAATTATAATATTCAAATATCTATTTAAAGACATTTATATTAATT

TGAAATAATAACATATACAATTAAAAGTGATTTTTTTTA
                                P16      P17      P18
```

**Table S1 Number of homopolymers in NM\_001012425.1**

The numbers of homopolymers of various lengths were counted. The corresponding numbers of different homopolymers with lengths of  $l_1=6, l_2=5, l_3=4$  are  $m_1=2, m_2=2, m_3=14$ , respectively.

| Homopolymer size | Homopolymer number | Position                                                                                    |
|------------------|--------------------|---------------------------------------------------------------------------------------------|
| $l_1=6$          | $m_1=2$            | $P_2, P_{10}$                                                                               |
| $l_2=5$          | $m_2=2$            | $P_7, P_{14}$                                                                               |
| $l_3=4$          | $m_3=14$           | $P_1, P_3, P_4, P_5, P_6, P_8, P_9, P_{11}, P_{12}, P_{13}, P_{15}, P_{16}, P_{17}, P_{18}$ |

## Box 2 An example of homopolymer-associated indels in NM\_001012425.1

Insertions were marked as nucleotides with borders, and deletions with background shadow. The numbers in braces were the order in which we inserted or deleted identical bases.

>gi|60218900|ref|NM\_001012425.1| Homo sapiens chromosome 1 open reading frame 146 (C1orf146), mRNA;

ACCCTGAGCGGTCTCTGAGGACCTGGTGAGCAGATTGTTGCACCATTAGAAGCTAGGT

TGATCCACAGACAGATGGCTGAAAGTGGAAAAAGAAAAATAAAAATGGACAACCACCA

P<sub>1</sub>(5) P<sub>2</sub>(1) P<sub>3</sub>(6)

TTATTATTAGCTCATCTCTTAAGAGTTATGAAGTTGCAACTGCCCTAGAAAATCGAAGCC

P<sub>4</sub>(7)

ACAAAGTTCGATATTCAGATTCAGTGGAAAATGGATCAATTATATTTTTCTCTTTCTGGAG

P<sub>5</sub>

P<sub>6</sub>(8)

TTGCATTTTTATTAATGGATACTAAGGAATGTCTTCTGTCAACTGAAGAAATATTCTAG

P<sub>7</sub>(3)

CCAAAAATTGAGAAATTTATTAACATTCACCAAAATAGTTTTTTTGGTTTTGTCTGCTGCC

P<sub>8</sub>(9)

P<sub>9</sub>(10)

P<sub>10</sub>(2)

P<sub>11</sub>

TCCATGGGCCTGAAGAATGGAAACTGATGTTTCAGGATTCAGCAGAGATTCCTGGGTTG

TAACTTACGAATACTTCCAGTACACAACACAGTAAATGCTATTAATCTTATGTGCACTAT

AGCAAAGACTACCTCCAAACCATACATAGATAGCATTGCTACAGAATGATAACAGCTA

AAGCTTACATCATTGAGCAAAGTCCTGTTTGGAAAACACTTCAGAAGATAAAAACTGAA

P<sub>12</sub>(11)

P<sub>13</sub>(12)

TAGTGATTCAGTTAACCCAAATTAGAGTACCAACTTAATGTTTTTCTCGAAGAATGTGA

P<sub>14</sub>(4)

P<sub>15</sub>(13)

AAAATAATTAGACCTGTAAATTATAATATTCAAATATCTATTTAAAGACATTTATATTAATT

TGAAATAATAACATATAACAATTAAAAGTGATTTTATTTTTA

P<sub>16</sub>

P<sub>17</sub>(14) P<sub>18</sub>(15)
