# Supplementary material for: PLEK: a tool for predicting long non-coding RNAs and messenger RNAs based on an improved k-mer scheme
Source: PubMed Central journal article supplement (PMC4177586; doi:10.1186/1471-2105-15-311), 2014-09-19
Supplement: 12859_2013_6586_MOESM3_ESM.pdf [file 12859_2013_6586_MOESM3_ESM.pdf]

## Additional file 3 of PLEK

### Visualization of the $k$ -mer usage differences between mRNAs and lncRNAs

To visualize the  $k$ -mer usage differences between mRNAs and lncRNAs, we define the log-ratio of the string usage frequencies between mRNAs and lncRNAs by formula (1), where  $a_m^+$  is the average of the  $m$ -th feature in positive samples ( $m=1,2,\dots,1364$ ).  $a_m^-$  is the average of the  $m$ -th feature in negative samples,  $r_m$  is the log-ratio (base 2) of positive samples'  $k$ -mer usage frequency average to negative samples' for the  $m$ -th feature.

$$r_m = \log(a_m^+ / a_m^-), m=1,2,\dots,1364 \quad (1)$$

The results are showed in **Figure S1**. Dark green lines (above 0) represent that these strings are more frequently used in mRNAs than lncRNAs, and blue lines (below 0), lncRNAs than mRNAs.

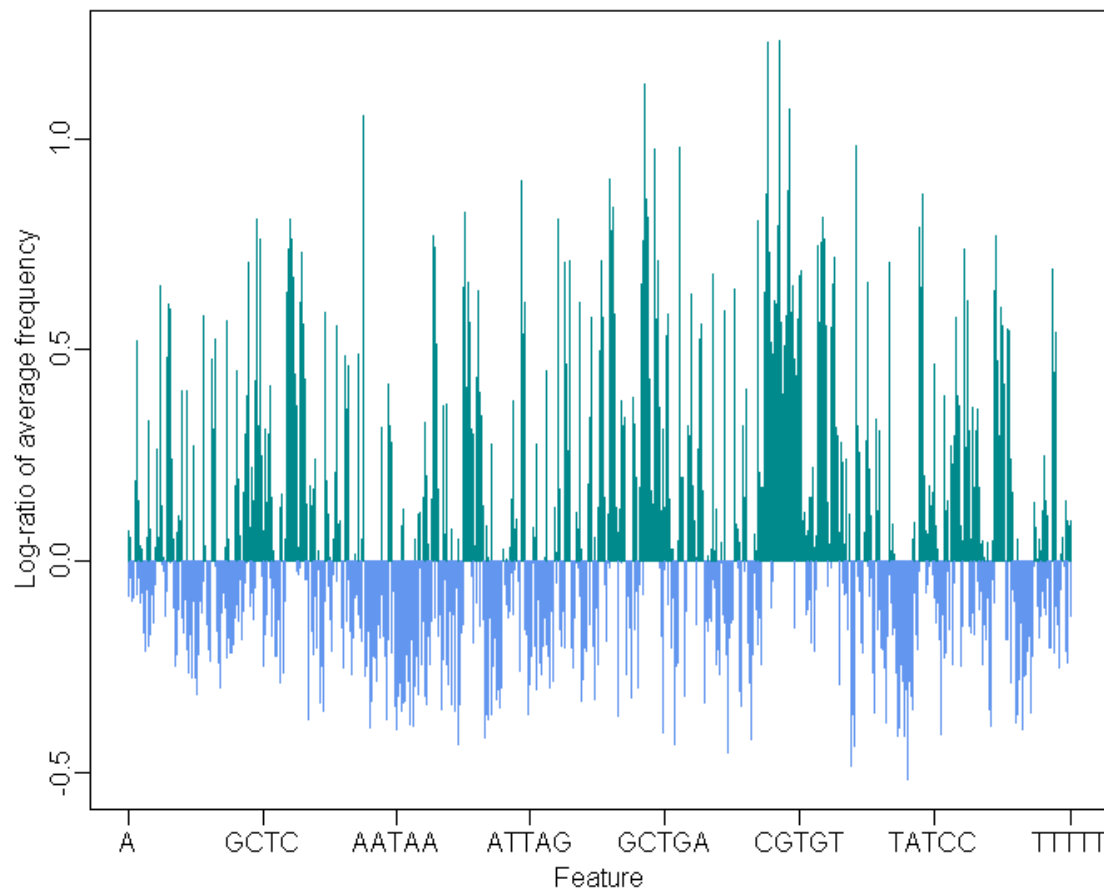

**Figure S1 Average calibrated  $k$ -mer usage frequency log-ratio of protein-coding to non-coding transcripts.**

The x-axis represents the  $k$ -mer strings ( $A, C, G, T, AA, AC, AG, AT, \dots, TTTT$ ). The y-axis represents the log-ratios of average calibrated  $k$ -mer usage frequencies in protein-coding transcripts to those in non-coding transcripts.
